# Supplementary material for: Impact of following a healthy dietary pattern with co-consuming wolfberry on number and function of blood outgrowth endothelial cells from middle-aged and older adults
Source: Royal Society of Chemistry journal article supplement (doi:10.1039/d1fo02369a), 2021-11-22
Supplement: d1fo02369a1.pdf [file d1fo02369a1.pdf]

## **SUPPLEMENTAL MATERIAL**

### **Impact of following a healthy dietary pattern with co-consuming wolfberry on number and function of blood outgrowth endothelial cells from middle-aged and older adults**

*Xia et al.*

It includes:

1. Supplementary Figures 1–4
2. Supplementary Tables 1–2

## Supplementary Figures

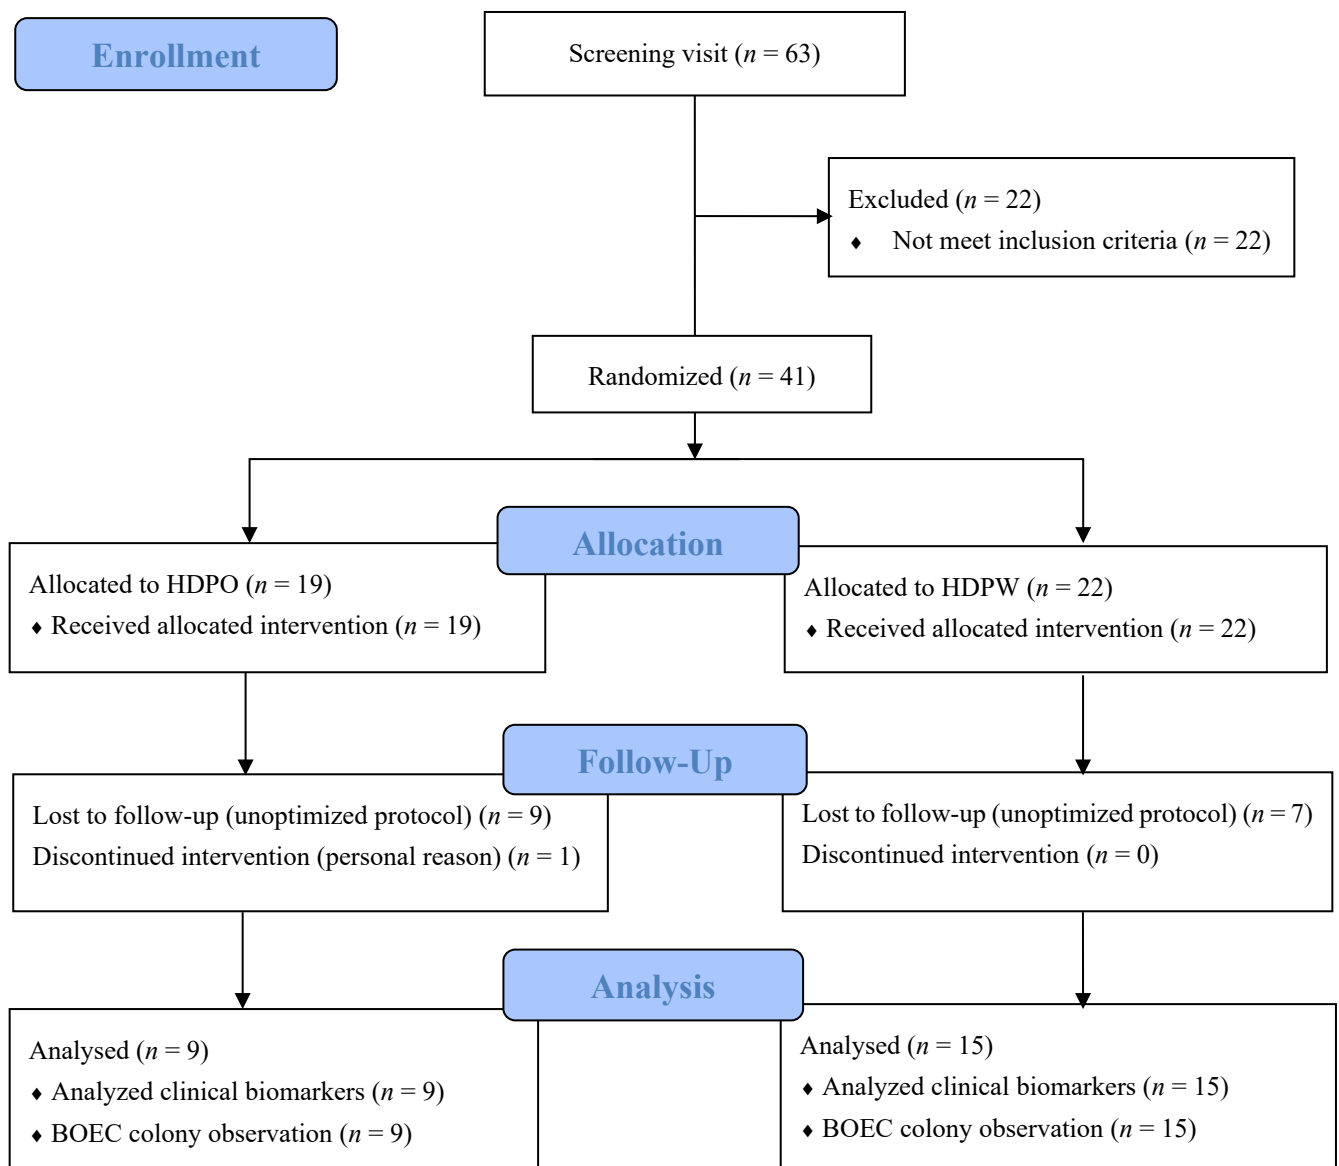

**Figure S1** Flow of participants through the study. HDPO, healthy dietary pattern only;

HDPW, HDP supplemented with wolfberry; BOEC: blood outgrowth endothelial cell.

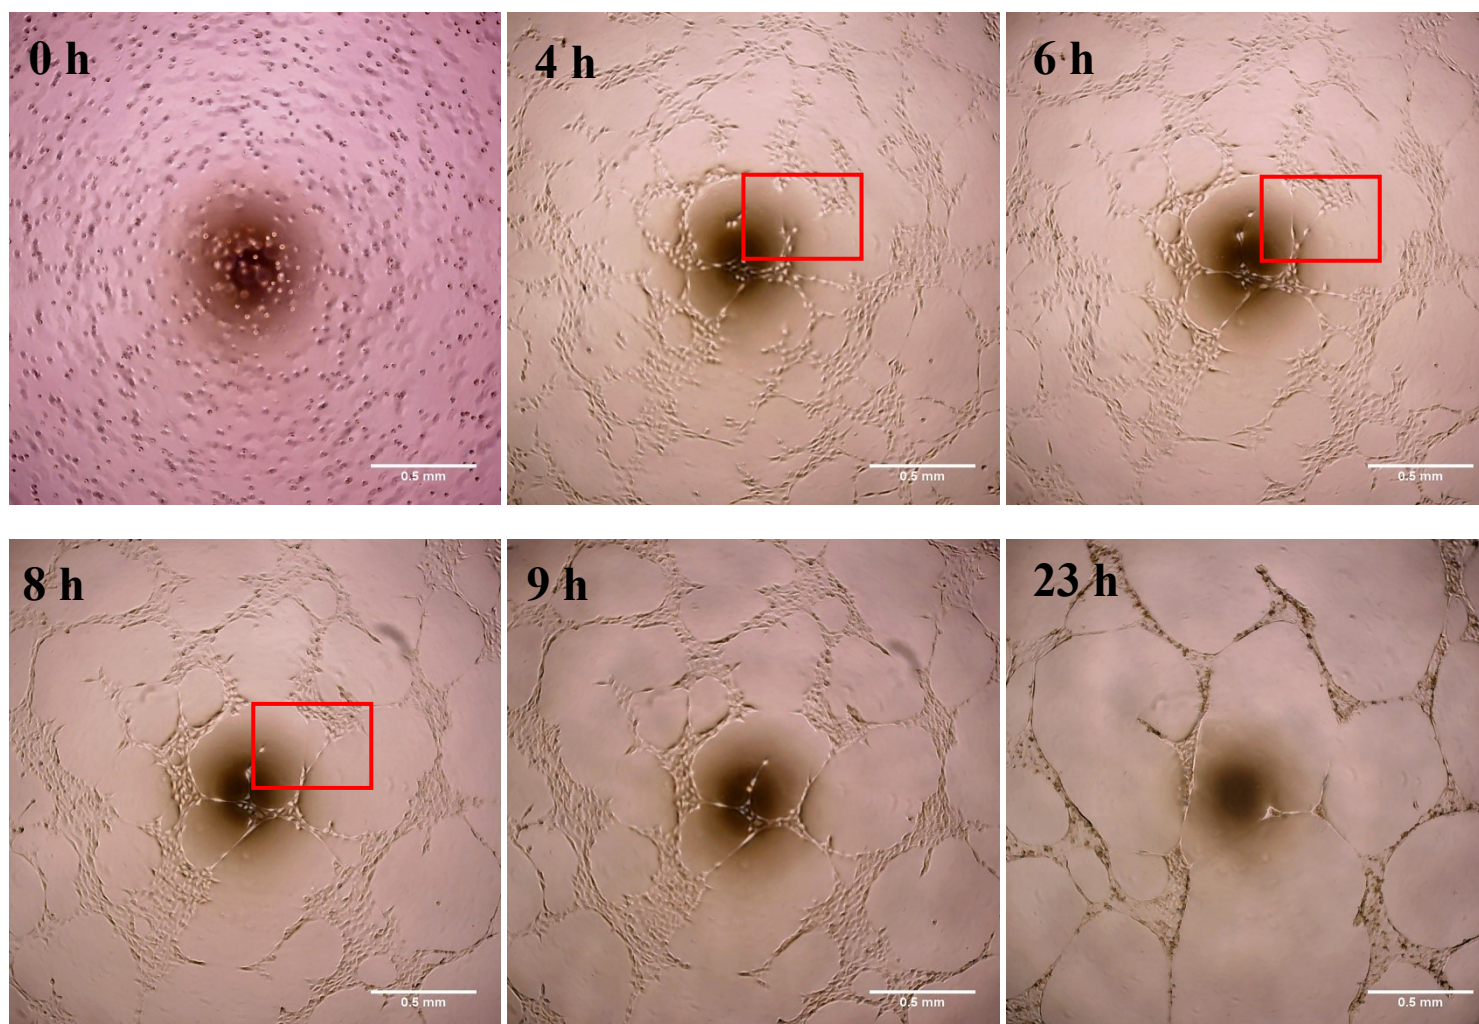

**Figure S2** Tube formation of BOECs on gelled basement membrane extract at different time points. Red squares highlight the tiny tube structures,

which began to decline at the 8 h time-point. Therefore, 6 h duration was selected for tube formation assay. Abbreviations: BOEC, blood outgrowth endothelial cell. Images were taken by EVOS XL Core Cell Imaging System (Life Technologies, USA) with 4× objective.

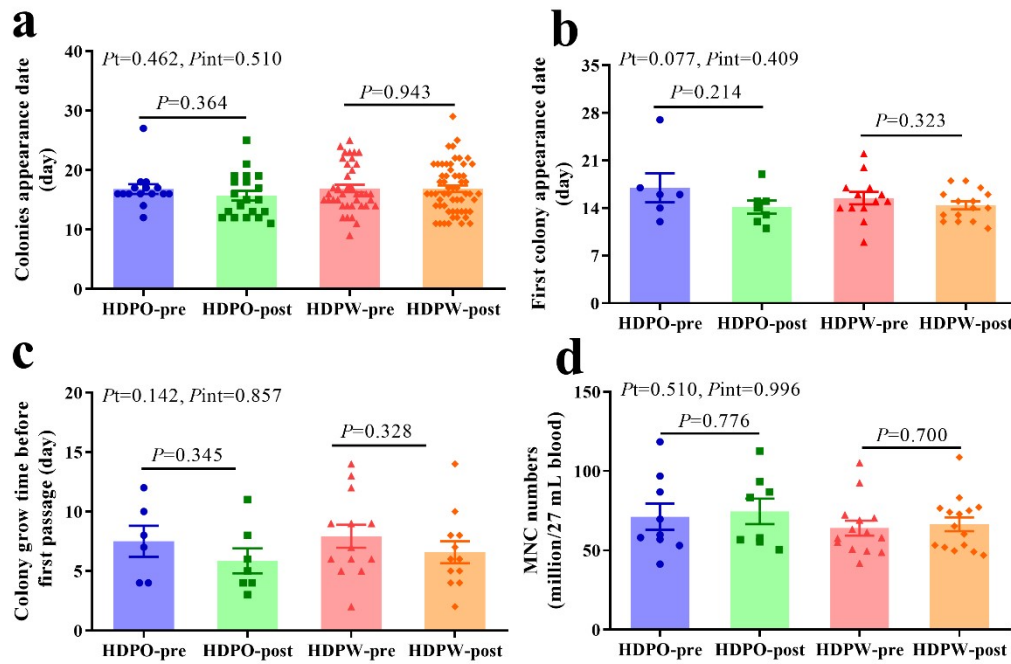

**Figure S3** Parameters show growth rate of BOECs (**a–c**) and peripheral blood MNC number (**d**). Graphs are plotted as means with SEM. Statistical comparisons of pre- and post-intervention within groups were performed by unpaired *t*-test or Mann–Whitney test. Two-way ANOVA was used to determine the *P* values of time (*P<sub>t</sub>*) and interaction (*P<sub>int</sub>*) effects. Abbreviations: BOEC, blood outgrowth endothelial cell; HDPO, healthy dietary pattern only; HDPW, HDP supplemented with wolfberry; MNC, mononuclear cell.

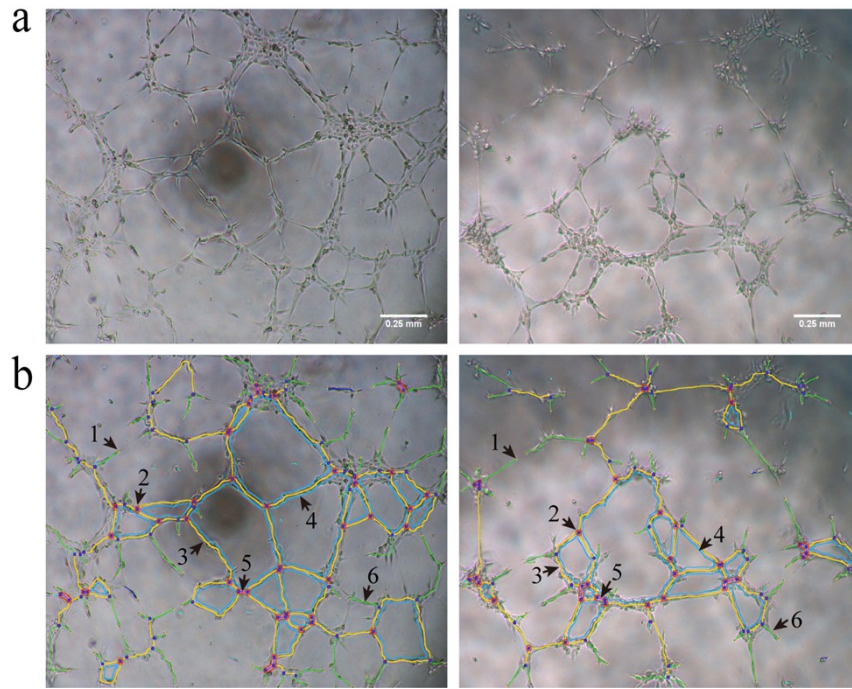

**Figure S4** Representative images of capillary-like structure of BOECs. **(a)** Capillary-like structures of BOECs with different tube formation capacities. **(b)** Characterization of the structures using Angiogenesis Analyzer. Arrows 1–6 point representative extremities, master junctions, master segments, meshes, segments and branches, respectively. Abbreviations: BOEC, blood outgrowth endothelial cell.

## Supplementary Tables

**Table S1** CD34 and KDR expression in BOECs and MNCs

| Parameter    | HDPO                                       |            |            | HDPW  |            |            |
|--------------|--------------------------------------------|------------|------------|-------|------------|------------|
|              | Pre-                                       | Post-      | # <i>P</i> | Pre-  | Post-      | # <i>P</i> |
| <b>BOECs</b> | <b>CD34<sup>+</sup> (%)</b>                |            |            |       |            |            |
|              | Range                                      | 9.0–95.9   | 35.7–99.9  |       | 37.6–97.0  | 15.5–88.9  |
|              | Average (SEM)                              | 45.0(20.2) | 60.1(14.1) | 0.556 | 56.4(10.9) | 56.5(9.1)  |
|              | <b>KDR<sup>+</sup> (%)</b>                 |            |            |       |            |            |
|              | Range                                      | 99.6–100.0 | 98.4–100.0 |       | 99.8–100.0 | 98.0–100.0 |
|              | Average (SEM)                              | 99.8(0.1)  | 99.6(0.3)  | 0.786 | 99.9(0.0)  | 99.7(0.2)  |
|              | <b>CD34<sup>+</sup>KDR<sup>+</sup> (%)</b> |            |            |       |            |            |
|              | Range                                      | 9.0–95.5   | 35.7–99.8  |       | 37.6–97.0  | 15.5–97.0  |
|              | Average (SEM)                              | 44.9(20.1) | 59.8(13.9) | 0.551 | 56.4(10.9) | 56.3(9.0)  |
|              | <b>CD34<sup>+</sup> (%)</b>                |            |            |       |            |            |
| <b>MNCs</b>  | Range                                      | 0.9–48.5   | 1.3–67.8   |       | 1.3–51.3   | 1.2–67.6   |
|              | Average (SEM)                              | 26.7(5.1)  | 32.9(10.1) | 0.566 | 22.7(5.0)  | 27.0(6.0)  |
|              | <b>KDR<sup>+</sup> (%)</b>                 |            |            |       |            |            |
|              | Range                                      | 1.1–2.0    | 0.8–3.2    |       | 0.7–3.7    | 0.8–3.5    |
|              | Average (SEM)                              | 1.6(0.1)   | 1.5(0.3)   | 0.250 | 1.9(0.2)   | 1.4(0.2)   |
|              | <b>CD34<sup>+</sup>KDR<sup>+</sup> (%)</b> |            |            |       |            |            |
|              | Range                                      | 0.1–1.4    | 0.0–1.6    |       | 0.1–1.1    | 0.1–1.1    |
|              | Average (SEM)                              | 0.6(0.1)   | 0.6(0.2)   | 0.973 | 0.6(0.1)   | 0.5(0.1)   |

#Statistical comparisons of pre- and post-intervention within groups were performed by unpaired *t*-test or Mann–Whitney test. No significant differences were observed from baseline data comparisons within groups and two-way ANOVA analyses (data not shown). Sample number for BOEC analysis in HDPO-pre, HDPO-post, HDPW-pre, and HDPW-post groups were 4, 5, 5 and 10, respectively. Sample number for MNC analysis in HDPO and HDPW groups were 8 and 13, respectively. Abbreviations: BOEC, blood outgrowth endothelial cell; HDPO, healthy dietary pattern only; HDPW, HDP supplemented with wolfberry; MNC, mononuclear cells.

**Table S2** Other parameters that characterized BOECs' tube formation capacity.

| Parameter                         | HDPO                |                      |            |            | HDPW                |                       |            |            |
|-----------------------------------|---------------------|----------------------|------------|------------|---------------------|-----------------------|------------|------------|
|                                   | Pre- ( <i>n</i> =5) | Post- ( <i>n</i> =5) | Change (%) | # <i>P</i> | Pre- ( <i>n</i> =8) | Post- ( <i>n</i> =11) | Change (%) | # <i>P</i> |
| Number nodes                      | 196.3 ± 43.3        | 192.9 ± 34.5         | -1.8       | 0.952      | 244.7 ± 23.6        | 238.0 ± 24.0          | -2.8       | 0.848      |
| Number junctions                  | 56.8 ± 12.4         | 55.6 ± 9.8           | -2.1       | 0.942      | 70.2 ± 6.7          | 68.8 ± 6.9            | -1.9       | 0.893      |
| Number pieces                     | 123.5 ± 17.2        | 115.5 ± 14.2         | -6.5       | 0.730      | 146.8 ± 12.0        | 139.6 ± 11.0          | -4.9       | 0.668      |
| Number segments                   | 59.8 ± 17.3         | 60.5 ± 13.2          | 1.1        | 0.976      | 74.0 ± 8.0          | 76.1 ± 9.2            | 2.8        | 0.873      |
| Number branches                   | 50.6 ± 3.6          | 46.0 ± 3.6           | -9.2       | 0.392      | 62.1 ± 5.1          | 54.4 ± 2.8            | -12.5      | 0.167      |
| Number isolated elements          | 13.1 ± 3.1          | 9.1 ± 2.3            | -30.8      | 0.324      | 10.7 ± 2.0          | 9.2 ± 0.9             | -14.1      | 0.462      |
| Total length (mm)                 | 15.8 ± 2.2          | 15.7 ± 1.9           | -1.0       | 0.958      | 17.3 ± 1.0          | 17.6 ± 1.4            | 1.5        | 0.888      |
| Total segment length (mm)         | 7.9 ± 2.3           | 8.4 ± 1.9            | 6.6        | 0.867      | 8.7 ± 0.8           | 9.8 ± 1.1             | 13.2       | 0.461      |
| Total branch length (mm)          | 6.3 ± 0.5           | 6.0 ± 0.4            | -3.7       | 0.708      | 7.3 ± 0.5           | 6.6 ± 0.4             | -9.5       | 0.492      |
| Total isolated branch length (mm) | 1.6 ± 0.4           | 1.2 ± 0.4            | -27.5      | 0.445      | 1.3 ± 0.3           | 1.1 ± 0.1             | -14.6      | 0.444      |
| Branching interval (μm)           | 152.0 ± 43.3        | 179.7 ± 39.3         | 18.2       | 0.648      | 144.8 ± 15.8        | 179.7 ± 18.5          | 24.1       | 0.192      |
| Mesh index (mm)                   | 0.435 ± 0.028       | 0.443 ± 0.022        | 1.8        | 0.828      | 0.426 ± 0.011       | 0.426 ± 0.028         | 0.0        | 0.999      |

Instruction of parameters can be found from the online description of Angiogenesis Analyzer for ImageJ

(<http://image.bio.methods.free.fr/ImageJ/?Angiogenesis-Analyzer-for-ImageJ&lang=en>). Picture analyze area is 3.50 mm<sup>2</sup>. Values are presented

as means ± SEM. #Statistical comparison of pre- and post-intervention within groups was performed by unpaired *t*-test or Mann–Whitney test. No

significant differences were observed from baseline data comparisons and two-way ANOVA analyses (data not shown). Abbreviations: BOECs,

blood outgrowth endothelial cells; HDPO, healthy dietary pattern only; HDPW, HDP supplemented with wolfberry.
